# Supplementary material for: Differences in the QBO response to stratospheric aerosolmodification depending on injection strategy and species
Source: Copernicus journal article supplement (doi:10.5194/acp-2020-1104), 2020-11-06
Supplement: Supplementary file 1 [file acp-2020-1104-supplement.pdf]

# Supplementary material for „Differences in the QBO response to stratospheric aerosol modification depending on injection strategy and species“

Henning Franke<sup>1,2</sup>, Ulrike Niemeier<sup>1</sup>, Daniele Visioni<sup>3</sup>

<sup>1</sup> Max Planck Institute for Meteorology, Bundesstr. 53, 20146Hamburg, Germany

<sup>2</sup> International Max Planck Research School on Earth System Modelling, Bundesstr. 53, 20146 Hamburg, Germany

<sup>3</sup> Sibley School for Mechanical and Aerospace Engineering, Cornell University, Ithaca, NY, USA

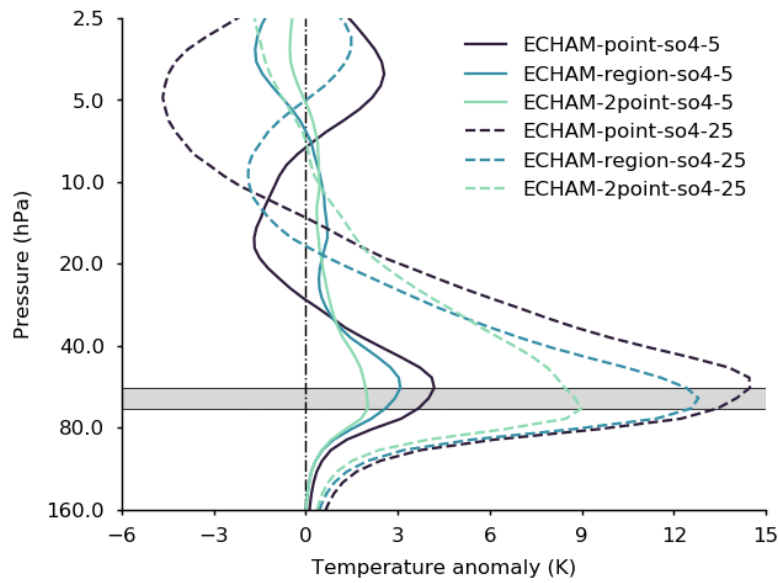

Figure S1: As Figure 4, but for the corresponding injection of AM-SO<sub>4</sub>.

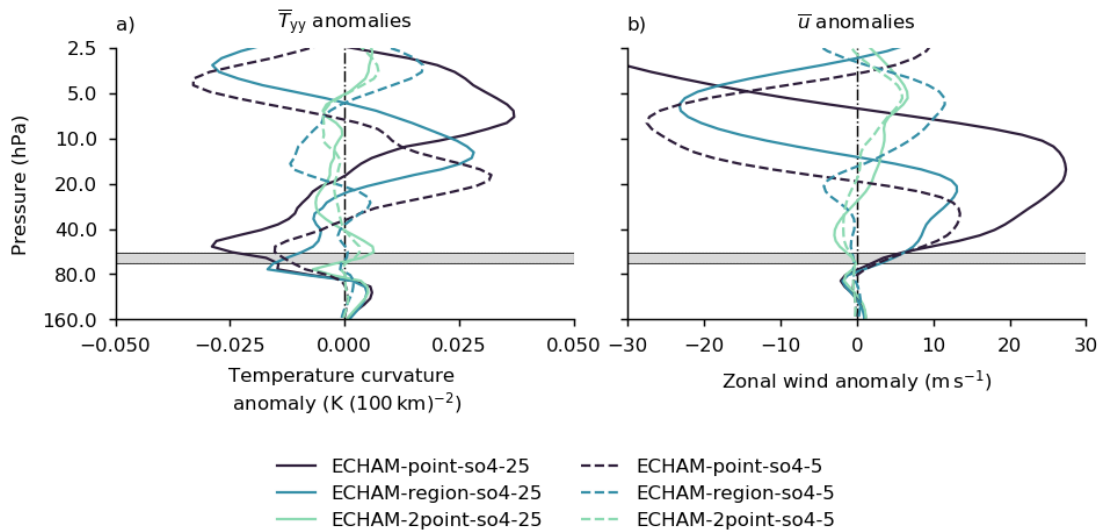

Figure S2: As Figure 6, but for the corresponding injection of SO<sub>2</sub>.

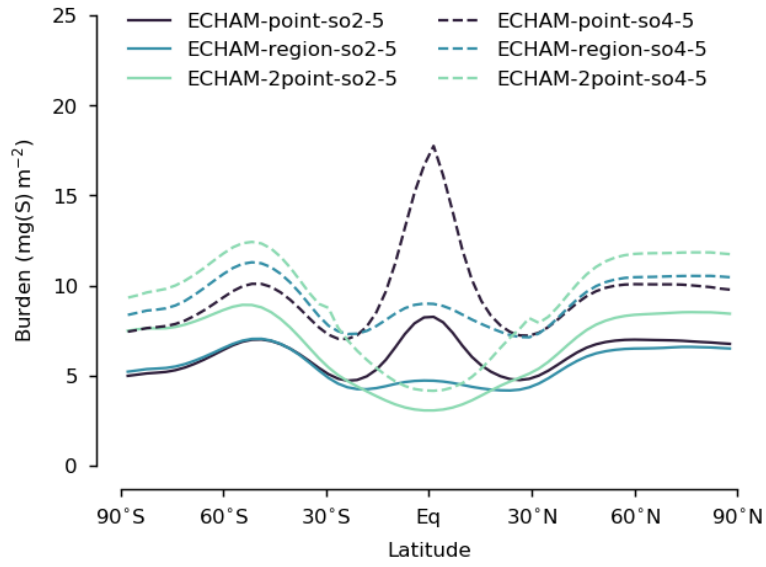

Figure S3: As Figure 7, but for the corresponding injection with an injection rate of  $5 \text{ Tg(S)yr}^{-1}$ .

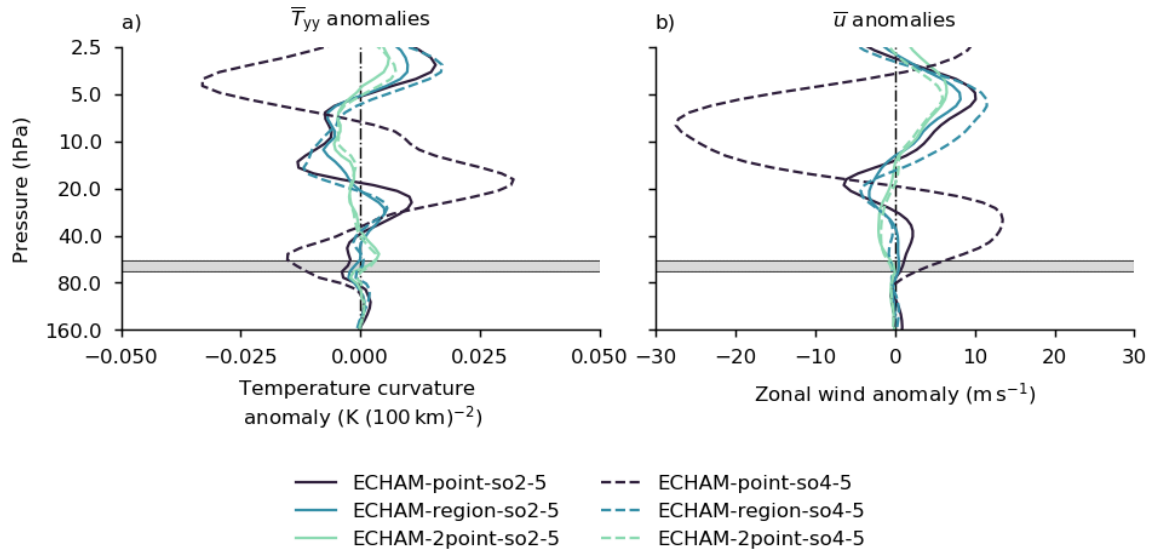

Figure S4: As Figure 8, but for the corresponding injection with an injection rate of  $5 \text{ Tg(S)yr}^{-1}$ .

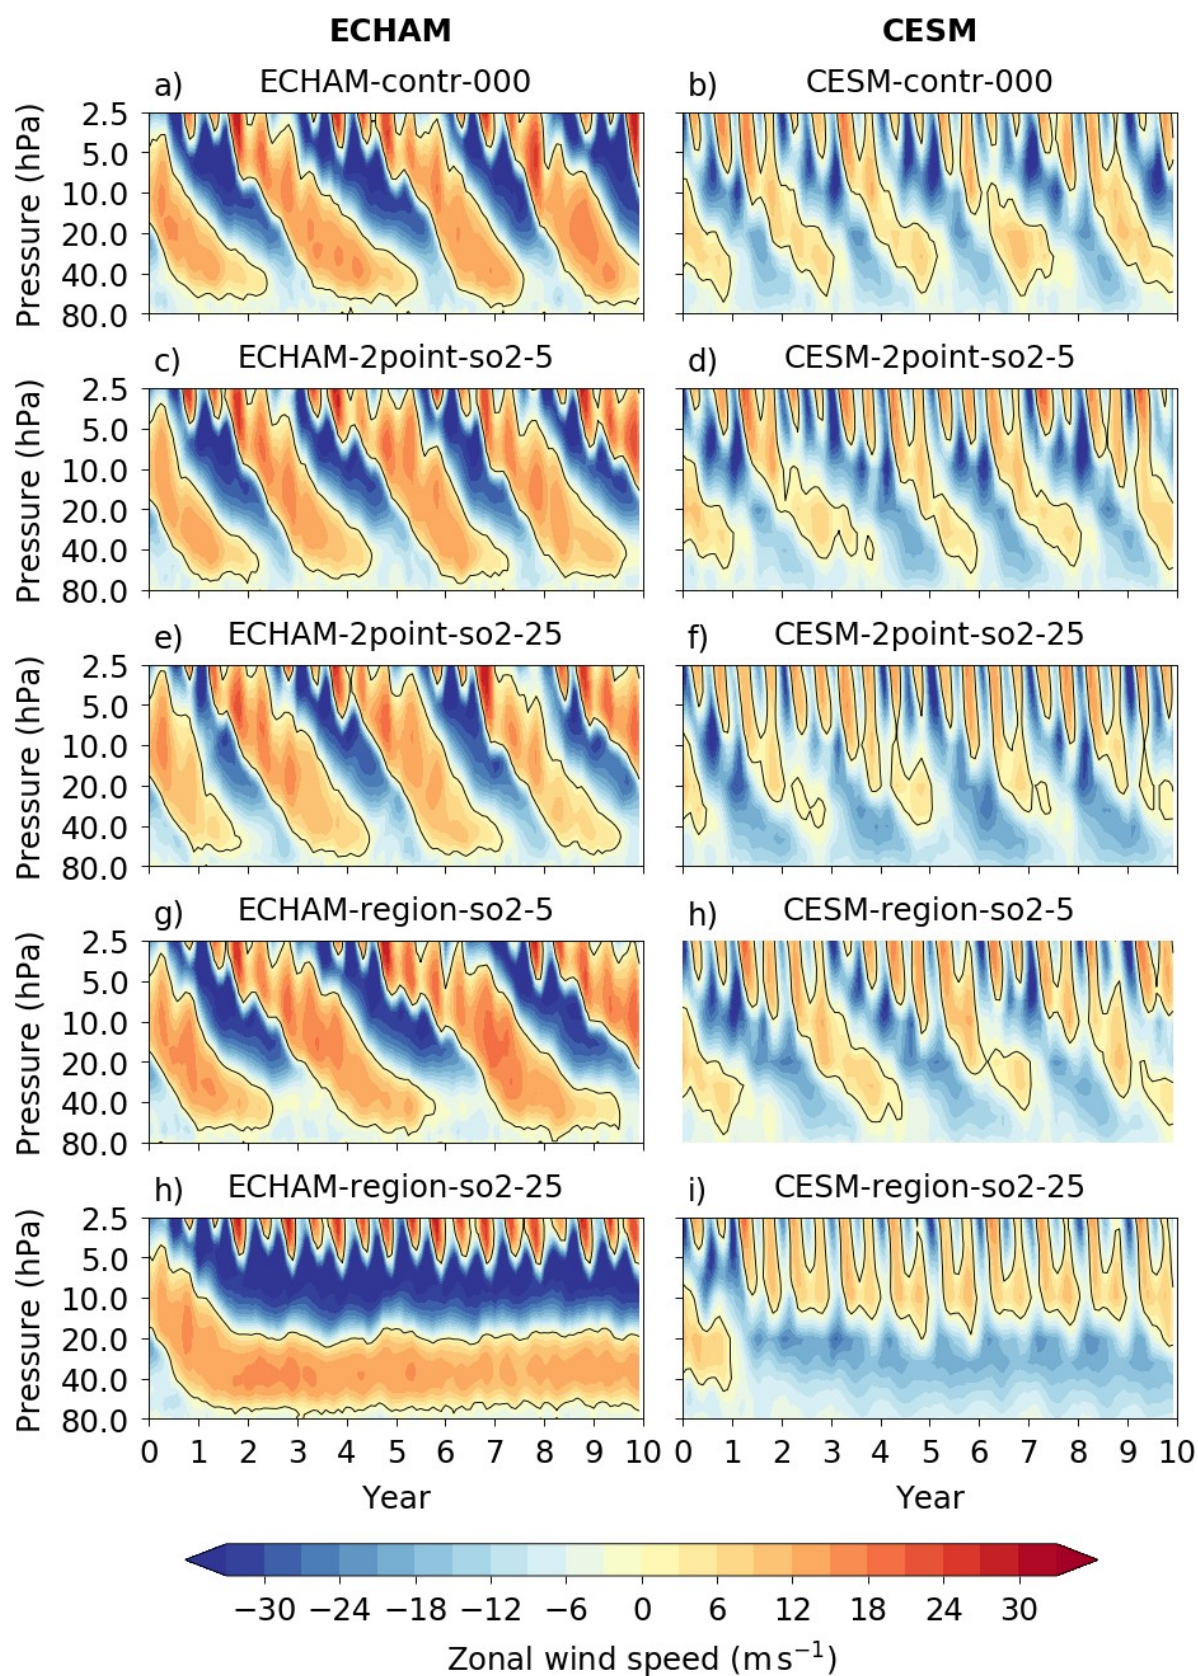

Figure S5: As Figure 11, but for the corresponding injection of SO<sub>2</sub>.



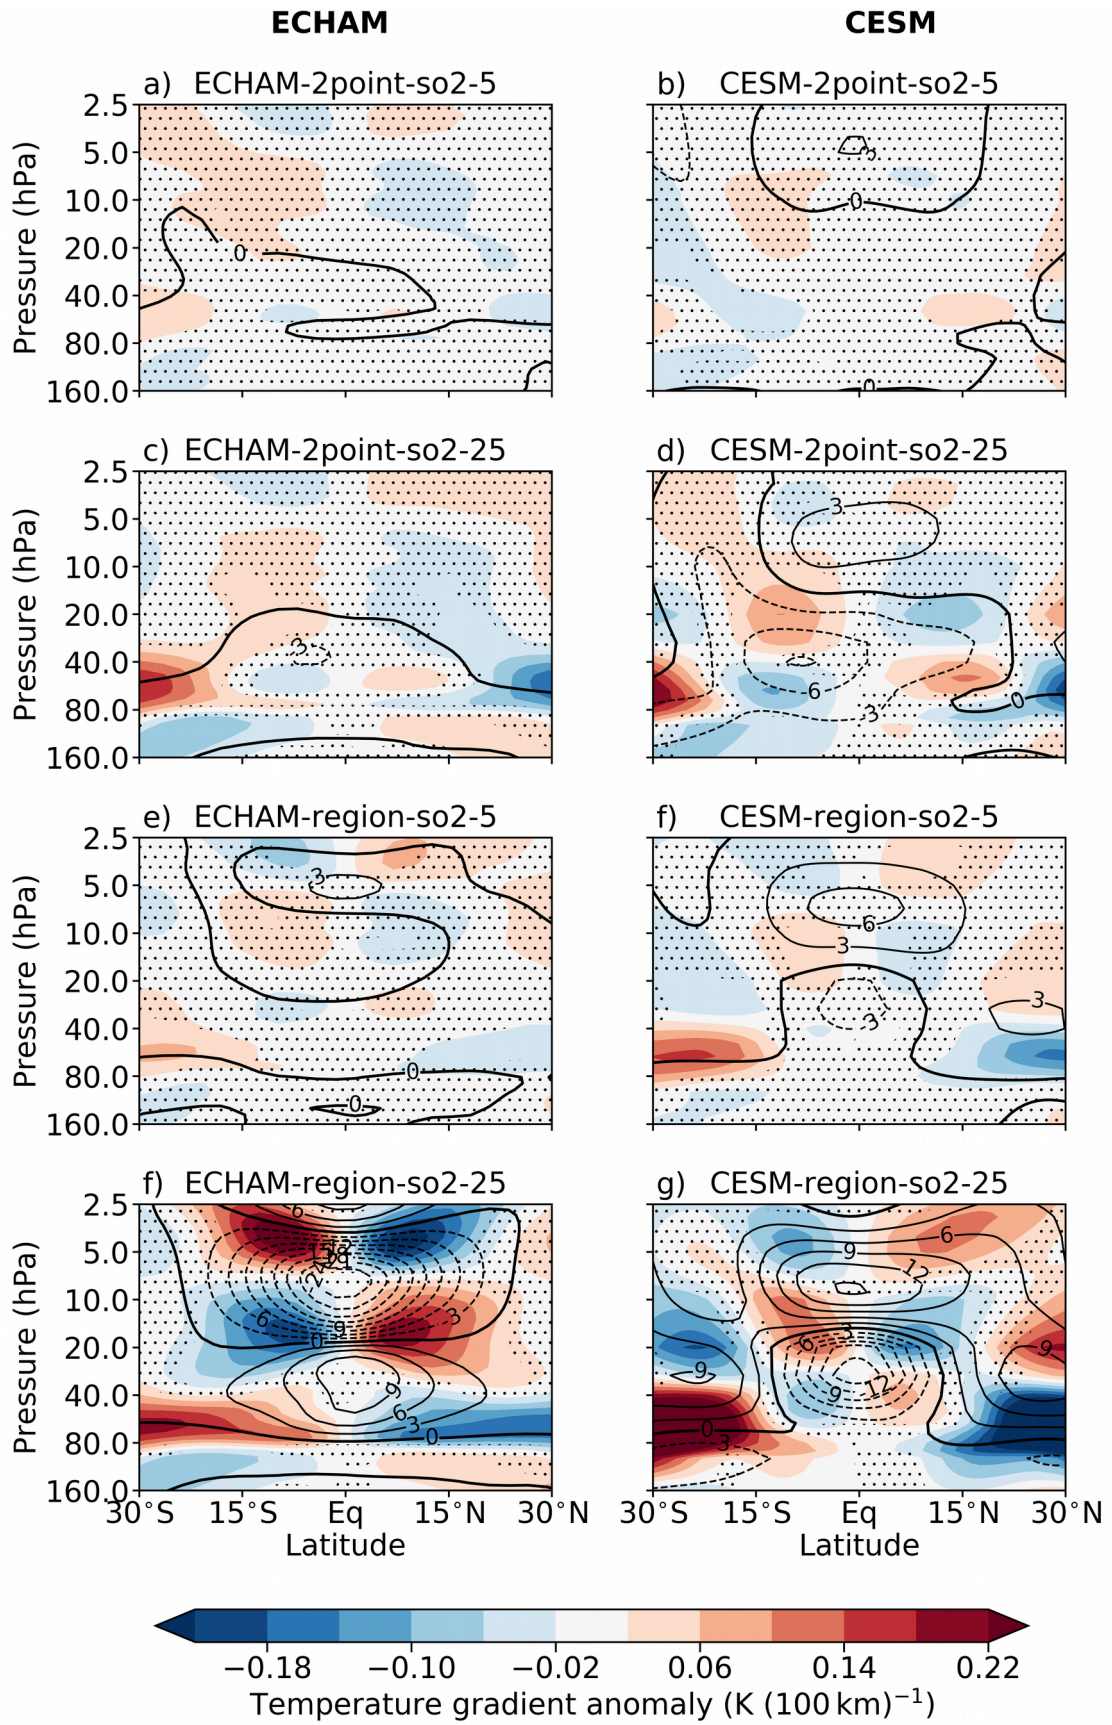

Figure S6: As Figure 12, but for the corresponding injection of  $\text{SO}_2$ .

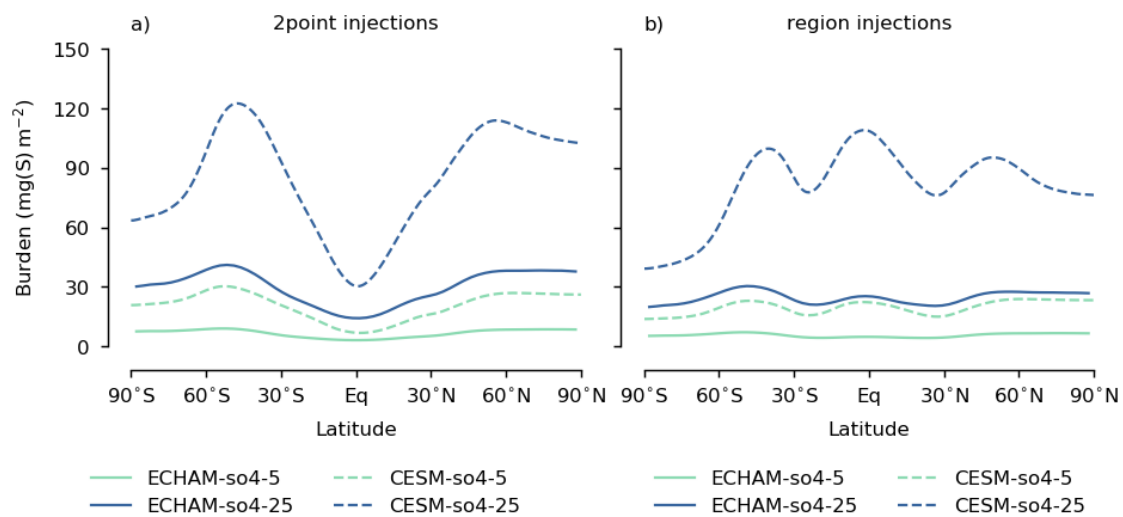

Figure S7: As Figure 13, but for the corresponding injection of SO<sub>2</sub>.
